# Supplementary material for: A methodology to facilitate critical care research using multiple linked electronic, clinical and administrative health records at population scale
Source: PubMed Central journal article supplement — Int J Popul Data Sci. 2022 Jul 18;7(1):1724. doi: 10.23889/ijpds.v7i1.1724 (PMC10464871; doi:10.23889/ijpds.v7i1.1724), 2022-07-18
Supplement: ijpds-07-1724-s001.pdf [file ijpds-07-1724-s001.pdf]

## Supplementary Appendix 1

### Data structure for the INTEGRATE critical admissions table

The INTEGRATE table structure, generated by the methodology, is designed to capture all the critical admissions from two data sources. The table is also designed to record the characteristics of the cases at each critical admission and the dates of the non-acute hospital admissions, emergency admissions and primary care interactions within the chosen time frame. The source of the critical admission is identified by means of a data source flag to identify those admissions common to both data sources (INTGRT) or those admissions recorded in a single data source (CCDS or ICNARC).

Supplementary table 1: Abbreviations used in the paper

| Field name                                                   | Data type     | Description                                                  | Valid entries                                    |
|--------------------------------------------------------------|---------------|--------------------------------------------------------------|--------------------------------------------------|
| ALF                                                          | Integer       | Unique Anonymised Linkage Field                              | 10-digit integer                                 |
| Week Of birth                                                | Date          | Monday of week of birth                                      | Valid date                                       |
| Sex                                                          | Character (1) | Sex                                                          | 1 = Male;2 = Female                              |
| Date of death                                                | Date          | Date of death                                                | Valid date                                       |
| Main cause of death                                          | Character (5) | Main cause of death                                          | ICD10 diagnosis code                             |
| Underlying cause of death                                    | Character (5) | Underlying cause of death                                    | ICD10 diagnosis code                             |
| Critical care admission date                                 | Date          | Admission date to critical care                              | Valid date                                       |
| Data Source Flag                                             | Character (6) | Data source where the critical care admission was identified | 'CCDS' 'ICNARC' 'INTGRT'                         |
| LSOA code (Lower Layer Super Output Area) at admission date  | Character (9) | Lower-layer Super Output Area code (2011)                    | Welsh codes begin with 'W'                       |
| Deprivation quintile (on critical care admission date)       | Integer       | Welsh Index of Multiple Deprivation [30]                     | 1 = most deprived<br>5 = least deprived          |
| ICNARC hospital admission date                               | Date          | Non-acute hospital admission date from ICNARC                | Valid date or NULL                               |
| Hospital admission date Prior to                             | Date          | Non-acute admission date from hospital records               | Valid date or Null within time frame of interest |
| Emergency admission date                                     | Date          | Admission date from emergency admissions records             | Valid date or Null within time frame of interest |
| Date of primary care interaction prior to critical admission | Date          | Date of interaction with primary care services               | Valid date or Null within time frame of interest |
| Admission Sequence                                           | Integer       | Admission sequence number for each ALF                       | Numeric value between 1 and 30                   |

## Supplementary Appendix 2

Supplementary table 2: Data structure generated by the INTEGRATE methodology

|        |                                                  |
|--------|--------------------------------------------------|
| ADDE   | Annual district death extract                    |
| ALF    | Anonymised Linking Field                         |
| CC     | Critical Care                                    |
| CCDS   | Critical care minimum dataset                    |
| EDDS   | Emergency department dataset                     |
| GP     | General practitioner (primary care)              |
| ICD 10 | International classification of diseases         |
| ICNARC | Intensive care national audit & research centre  |
| ICU    | Intensive care unit                              |
| IGRP   | Information governance review panel              |
| LSOA   | Lower super output area                          |
| PEDW   | Patient episode database for wales               |
| SAIL   | Secure anonymised information linkage (databank) |
| WDS    | Welsh demographic service dataset                |
| WIMD   | Welsh index of multiple deprivation              |
| WLGP   | Welsh longitudinal general practice dataset      |
